# Supplementary material for: Local anaesthetics combined with vasoconstrictors in patients with cardiovascular disease undergoing dental procedures: systematic review and meta-analysis
Source: HighWire-hosted journal article supplement (doi:10.1136/bmjopen-2020-044357), 2021-07-01
Supplement: bmjopen-2020-044357supp001_data_supplement.pdf [file bmjopen-2020-044357supp001_data_supplement.pdf]

**Appendix 1– Search strategy (via OVID, MEDLINE and EMBASE)**

- 1 exp Dentistry/ (357819)
- 2 exp Dentistry, Operative/ (32163)
- 3 exp Dental Care/ (29438)
- 4 Dental Restoration, Permanent/ (18759)
- 5 Dental Restoration Repair/ (102)
- 6 Periodontal Debridement/ (191)
- 7 Subgingival Curettage/ (977)
- 8 Dental Scaling/ (3316)
- 9 Chronic Periodontitis/ (1971)
- 10 Periodontal Diseases/ (24137)
- 11 Periodontal Surgery.mp. (1302)
- 12 Periodontal treatment.mp. (2728)
- 13 Oral Surgical Procedures/ (5363)
- 14 exp Surgery, Oral/ (7419)
- 15 Tooth Extraction/ (17008)
- 16 Dental Prosthesis/ (3384)
- 17 "Root Canal Therapy"/ (11735)
- 18 exp Dental Implants/ (17311)
- 19 Dental Implants, Single Tooth/ (1901)
- 20 Dental Implantation/ (3773)
- 21 1 OR 2 OR 3 OR 4 OR 5 OR 6 OR 7 OR 8 OR 9 OR 10 OR 11 OR 12 OR 13 OR 14 OR 15 OR 16 OR 17 OR 18 OR 19 OR 20 (372164)
- 22 exp Anesthetics, Local/ (96504)
- 23 exp Anesthesia, Local/ (15673)
- 24 exp Anesthesia, Dental/ (10417)
- 25 Lidocaine/ (22512)
- 26 Prilocaine/ (2018)
- 27 Bupivacaine/ (10713)
- 28 Procaine/ (11313)
- 29 Mepivacaine/ (1899)
- 30 Carticaine/ (451)
- 31 Etidocaine/ (288)
- 32 22 OR 23 OR 24 OR 25 OR 26 OR 27 OR 28 OR 29 OR 30 OR 31 (114729)
- 33 exp Cardiovascular Diseases/ (2067079)
- 34 Cardiac.mp. (631932)
- 35 Coronary Disease/ (128393)
- 36 Coronary Artery Disease/ (47503)
- 37 Coronary arteriosclerosis.mp. (733)
- 38 Coronariopathy.mp. (29)
- 39 Arrhythmias, cardiac/ (56112)
- 40 Heart Valve Diseases/ (21116)
- 41 Heart Diseases/ (63528)
- 42 Heart Failure/ (63528)
- 43 Rheumatic Heart Disease/ (12263)
- 44 Myocardial Ischemia/ (34898)
- 45 Myocardial Infarction/ (151398)
- 46 Hypertension (210548)
- 47 Hypertensive Patients.mp. (25167)
- 48 33 OR 34 OR 35 OR 36 OR 37 OR 38 OR 39 OR 40 OR 41 OR 42 OR 43 OR 44 OR 45 OR 46 OR 47 (2314784)
- 49 21 AND 32 AND 48 (752)

## Appendix 2 – Risk of bias of RCTs included (modified version of the Cochrane collaboration)

| Author                      | Year | Random sequence generation | Allocation concealment | Blinding of participants and personnel | Blinding of outcome assessment | Incomplete outcome data | Selective reporting | Other sources of bias |
|-----------------------------|------|----------------------------|------------------------|----------------------------------------|--------------------------------|-------------------------|---------------------|-----------------------|
| Abu-Mostafa, et al. 2015)   | 2015 | Definitely yes             | Probably no            | Probably no                            | Probably no                    | Probably yes            | Probably yes        | Probably yes          |
| Bronzo, et al. 2012         | 2012 | Probably yes               | Probably no            | Definitely no                          | Definitely no                  | Probably yes            | Probably no         | Probably yes          |
| Caceres, et al. 2008        | 2008 | Probably yes               | Definitely no          | Definitely no                          | Definitely no                  | Probably yes            | Probably no         | Probably yes          |
| Conrado, et al. 2007        | 2007 | Probably yes               | Probably yes           | Probably yes                           | Definitely no                  | Probably yes            | Probably no         | Probably yes          |
| Davenport, et al. 1990      | 1990 | Definitely yes             | Probably yes           | Probably yes                           | Probably yes                   | Probably yes            | Probably no         | Probably no           |
| Laragnoit, et al. 2009      | 2009 | Definitely yes             | Probably yes           | Definitely yes                         | Definitely yes                 | Probably yes            | Probably yes        | Probably yes          |
| Neves, et al. 2007          | 2007 | Probably yes               | Probably no            | Definitely no                          | Definitely no                  | Probably yes            | Probably no         | Probably yes          |
| Ogunlewe, et al. 2011       | 2011 | Probably yes               | Probably no            | Definitely no                          | Definitely no                  | Probably yes            | Probably no         | Probably no           |
| Santos-Paul, et al. 2015)   | 2015 | Probably yes               | Probably no            | Probably yes                           | Probably yes                   | Probably yes            | Probably yes        | Probably yes          |
| Torres-Lagares, et al. 2012 | 2012 | Definitely yes             | Probably yes           | Probably yes                           | Definitely no                  | Probably yes            | Definitely no       | Probably no           |

## Appendix 3- Characteristics of excluded studies

| Excluded studies                       | Exclusion reasons             |
|----------------------------------------|-------------------------------|
| Abu-Mostafa et al. 2015                | Group of patients without CVD |
| Agani et al. 2015                      | Not RCT                       |
| Bazhanov et al. 1983                   | Not RCT                       |
| Brkovic et al. 2008                    | Group of patients without CVD |
| Caviedes et al. 1983                   | Not RCT                       |
| Cecava, Mocek, Sel. 1965               | Not RCT                       |
| Harang. 1949                           | Not RCT                       |
| Montebugnoli, Pelliccioni, Borghi 1990 | Not RCT                       |
| Nava, Torres-Martinez 1967             | Not RCT                       |
| Neves et al. 2009                      | Pregnant patients             |
| Niwa 1999                              | Group of patients without CVD |
| Ohgami, Suda 1979                      | Not RCT                       |
| Rollason et al. 1977                   | Not RCT                       |
| Salman, Schwartz 1955                  | Not RCT                       |
| Tucci, Gabrielli, Mendes 1977          | Not RCT                       |
| Vieillefosse 1973                      | Not RCT                       |
| Yoshimura et al. 1987                  | Not RCT                       |
| Zivotic-Vanovic, Marjanovic 2006       | Group of patients without CVD |

CAD- Cardiovascular disease. RCT- Randomised controlled trial
